# Supplementary material for: In vivo dynamic analysis of BMP-2-induced ectopic bone formation
Source: PubMed Central journal article supplement (PMC7076033; doi:10.1038/s41598-020-61825-2), 2020-03-16
Supplement: 41598_2020_61825_MOESM4_ESM.pdf [file 41598_2020_61825_MOESM4_ESM.pdf]

1 ***In vivo* dynamic analysis of BMP-2-induced ectopic bone formation**

2 Kunihiko Hashimoto<sup>1,2</sup>, Takashi Kaito<sup>2</sup>, Masayuki Furuya<sup>1,2,3</sup>, Shigeto Seno<sup>4</sup>,

3 Daisuke Okuzaki<sup>5</sup>, Junichi Kikuta<sup>1</sup>, Hiroyuki Tsukazaki<sup>1,2</sup>, Hideo Matsuda<sup>4</sup>, Hideki

4 Yoshikawa<sup>2</sup>, and Masaru Ishii<sup>1</sup>

5

6 <sup>1</sup>Department of Immunology and Cell Biology, Graduate School of Medicine &

7 Frontier Biosciences, Osaka University, Osaka 565-0871, Japan

8 <sup>2</sup>Department of Orthopaedic Surgery, Graduate School of Medicine, Osaka

9 University, Osaka 565-0871, Japan

10 <sup>3</sup>Department of Orthopaedic Surgery, Japan Organization of Occupational Health

11 and Safety Osaka Rosai Hospital, Osaka 591-8025, Japan

12 <sup>4</sup>Department of Bioinformatic Engineering, Graduate School of Information

13 Science & Technology, Osaka University, Osaka 565-0871, Japan

14 <sup>5</sup>Genome Information Research Center, Research Institute for Microbial

15 Diseases, Osaka University, Osaka 565-0871, Japan

16

17 **Content of Supplementary information**

18

19 **Supplementary figure S1.** The method for ectopic bone imaging

20 **Supplementary figure S2.** Tracking, FACS, and RNA sequence analysis of OBs

21 **Supplementary figure S3.** Micro-CT images and histological sections of ectopic

22 bone

23 **Supplementary figure S4.** CF formation and OB morphology without or with

24 PTH administration

25 **Supplementary figure S5.** CDI analysis

26 **Supplementary Movie 1.** Intravital two-photon imaging of BMP-induced bone in

27 Col2.3-ECFP mice with visualized blood vessels

28 **Supplementary Movie 2.** Intravital two-photon imaging of BMP-induced ectopic

29 bone formation process in Col2.3-ECFP mice with visualized blood vessels

30 **Supplementary Movie 3.** Intravital two-photon imaging of OBs and OCs during

31 the BMP-induced ectopic bone formation process in Col2.3-ECFP/TRAP-

32 tdTomato mice treated with or without PTH

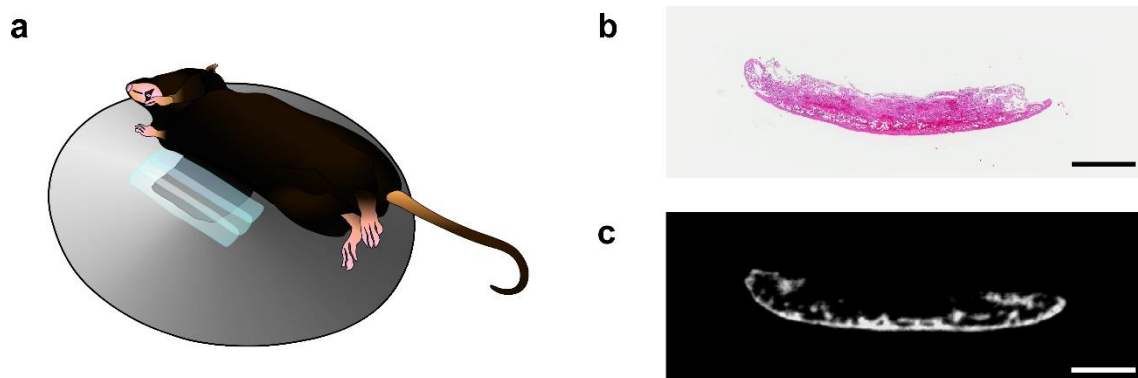

33

34 **Supplementary figure S1. The method for ectopic bone imaging**

35 (a) Schematic presentation of the method for fixing the flipped skin on the imaging  
36 table and observing the intravital ectopic bone formation under the microscope  
37 stage. The image was created by Canvas software (version X 16,  
38 <https://www.canvasgfx.com/>). (b) A representative H & E stained section of the  
39 newly formed bone on day 14. Scale bars, 1 mm. (c) A micro-CT image of the  
40 ectopic bone on day 14. Scale bars, 1 mm. Images of H & E stained section and  
41 micro CT is shown in a manner such that the top is the side where silicon sheet  
42 was inserted.

43

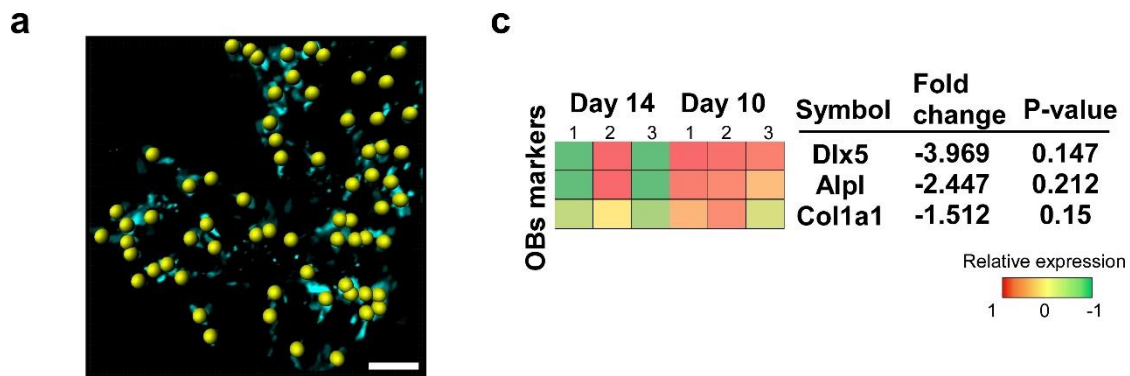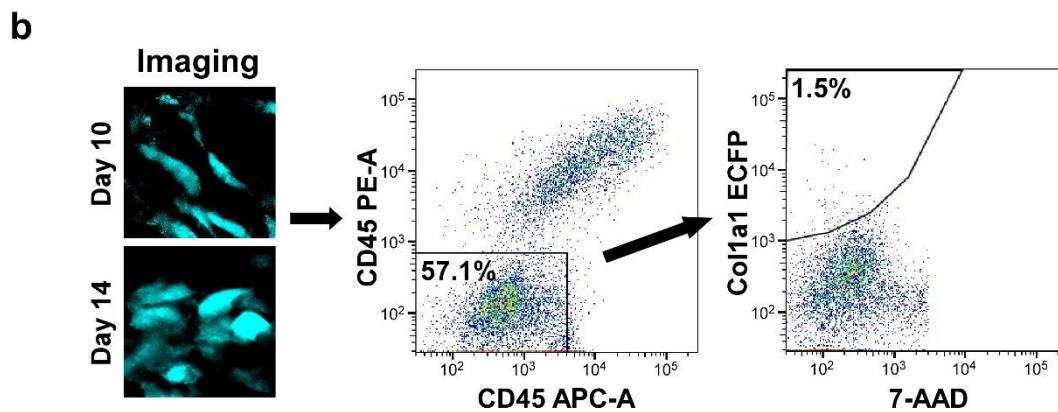

44

45 **Supplementary figure S2. Tracking, FACS, and RNA sequence analysis of**

46 **OBs**

47 (a) The motility of OBs was tracked at 10-min intervals for 3 h. Scale bar, 50  $\mu$ m.

48 Created the images using Imaris software (version 9.0, <https://imaris.oxinst.com/>)

49 (b) Representative flow cytometry dot plot analysis showing the percentage of

50 ECFP<sup>+</sup> cells in ectopic bone from *Col2.3-ECFP* mice on days 10 and 14. APC,

51 allophycocyanin; PE, phycoerythrin. (c) Heat map showing expression levels for

52 genes related to osteoblastic differentiation on day 10 and day 14 in ectopic bone.

53  $n = 3$ /group. Data are presented as means  $\pm$  SD. (Mann-Whitney test). The image

54 was created Canvas software (version X 16, <https://www.canvasgfx.com/>).

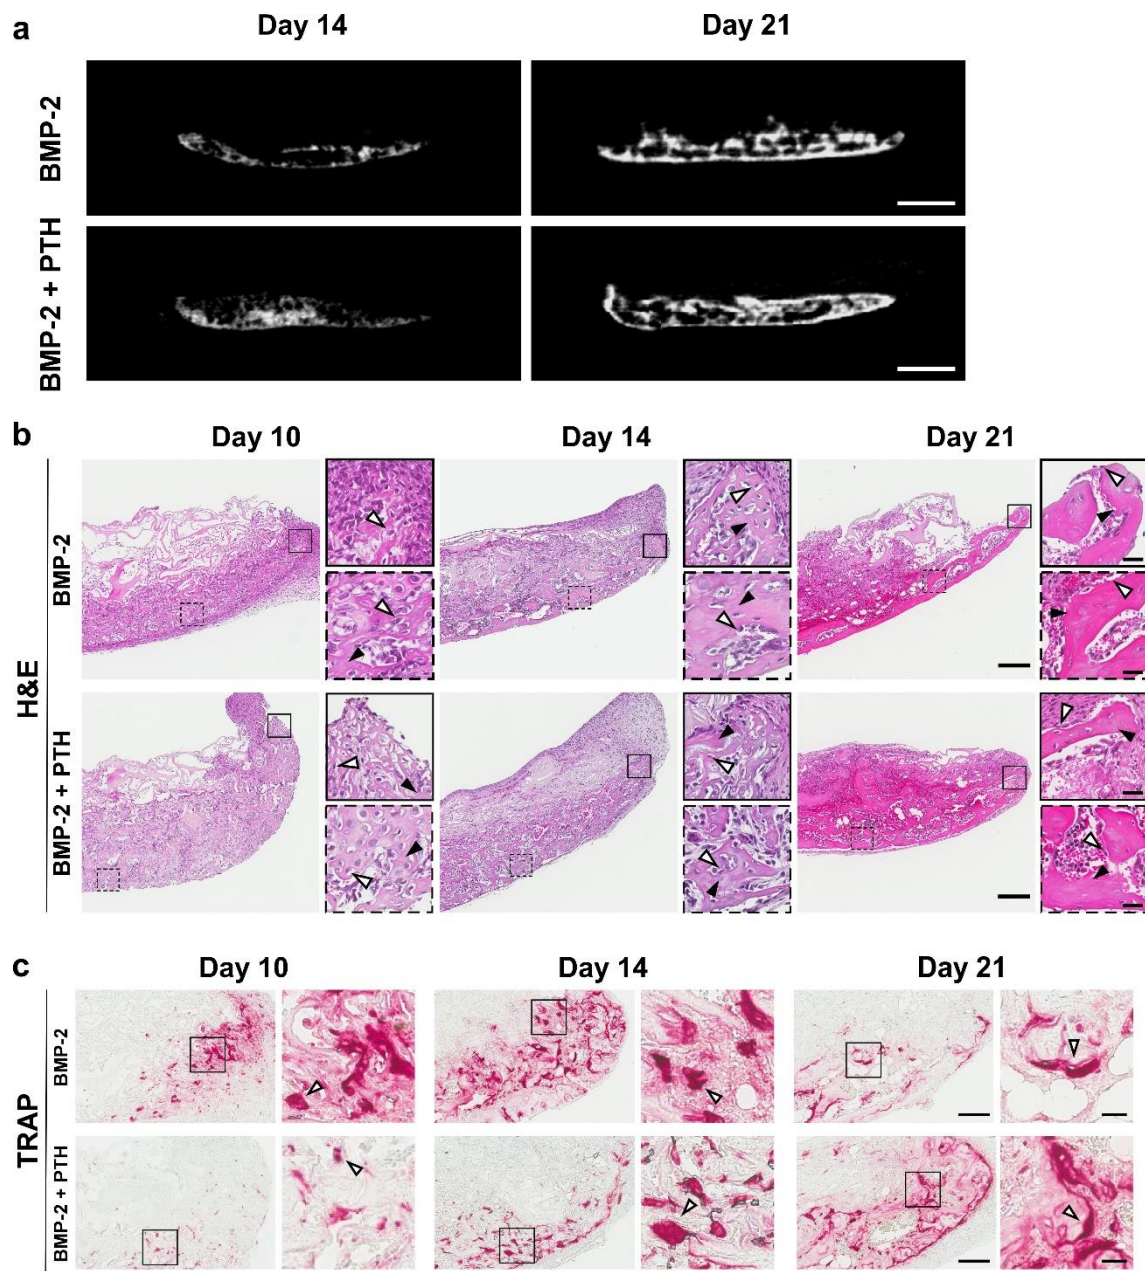

55

56 **Supplementary figure S3. Micro-CT images and histological sections of**  
 57 **ectopic bone**

58 (a) Representative micro-CT images of ectopic bone on days 14 and 21. Scale  
 59 bars, 1 mm. (b, c) Representative histological sections of ectopic bone in *Col2.3-*  
 60 *EGFP/TRAP-tdTomato* mice without and with PTH treatment on day 10 to 21.

61 Two magnified images of the region under observation using two-photon  
62 microscopy (region outlined) and the region where bone formation is in progress  
63 (region delineated by dotted lines) are shown. **(b)** Hematoxylin and eosin (H & E)  
64 staining of ectopic bone. OBs (open arrowheads) and bone formation (filled  
65 arrowheads). Scale bar, 200  $\mu\text{m}$  and 25  $\mu\text{m}$  (magnified images). **(c)**  
66 Representative TRAP-stained histological sections of ectopic bone. OCs, open  
67 arrowheads. Scale bars, 100  $\mu\text{m}$  and 20  $\mu\text{m}$  (magnified images).



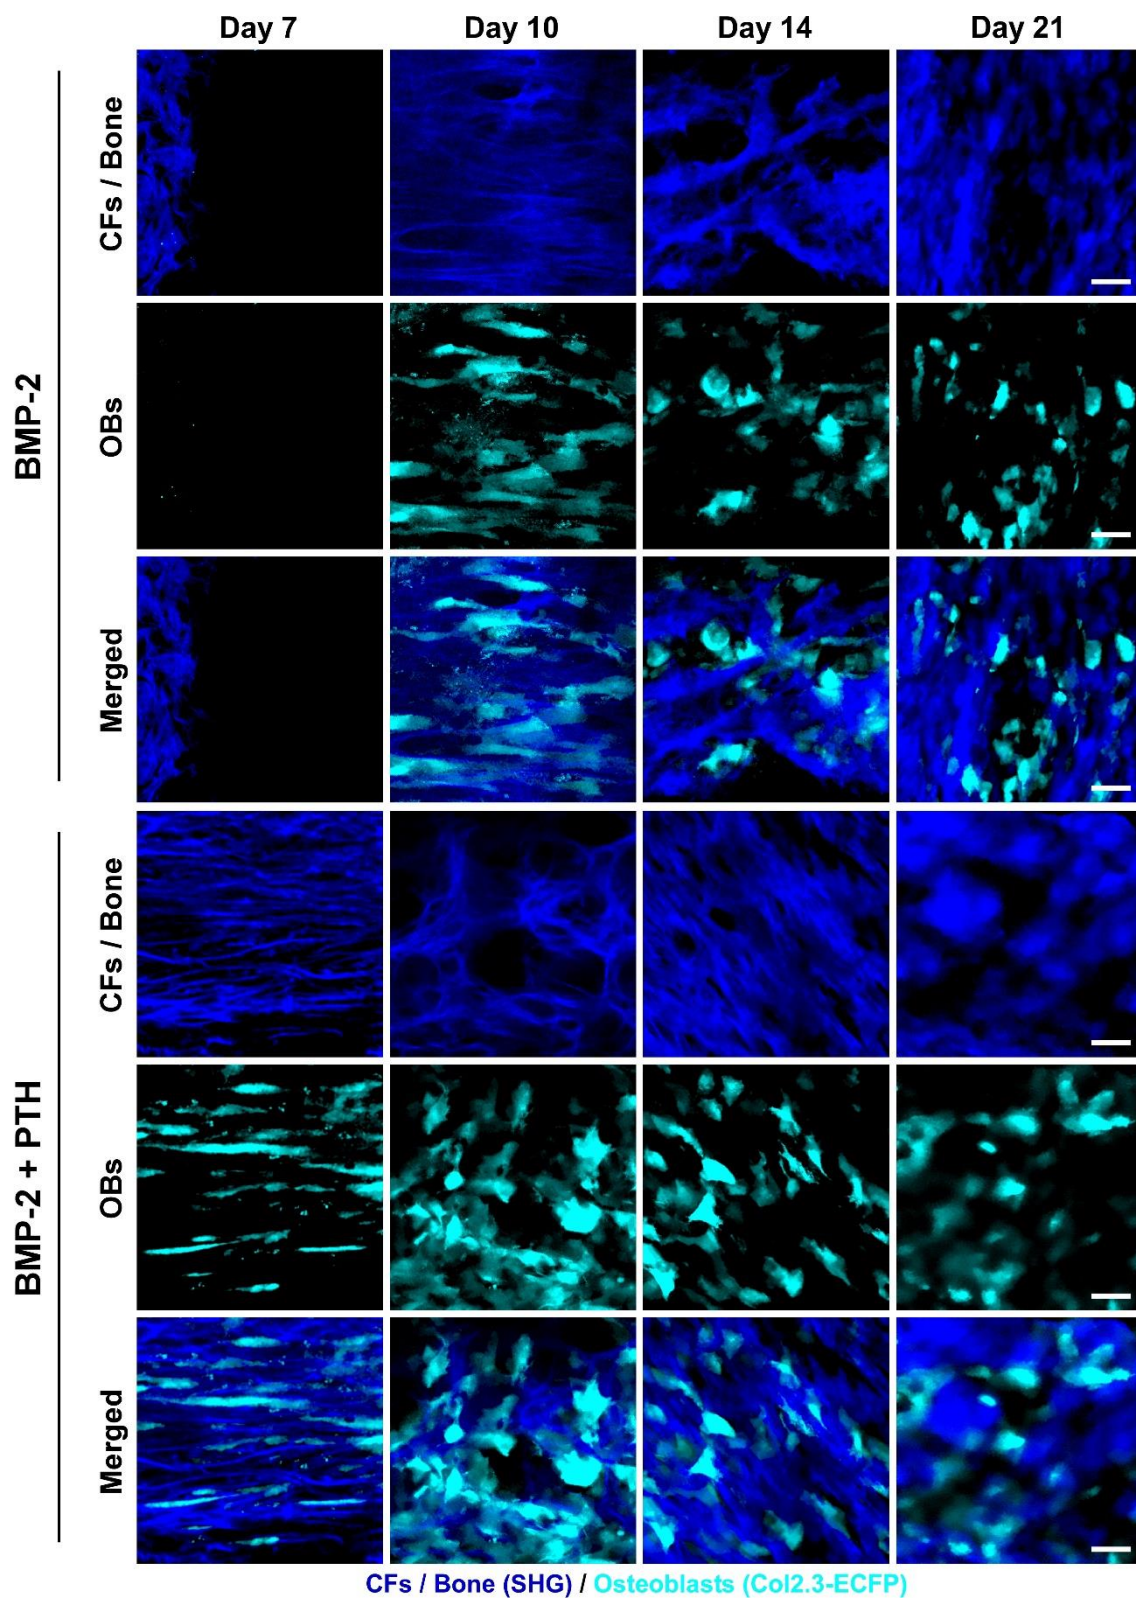

68

69 **Supplementary figure S4. CF formation and OB morphology without or with**

70 **PTH administration**

71 Temporal change of CF formation and OB morphology in *Col2.3-ECFP/TRAP-*  
72 *tdTomato* mice without (upper 3 panels) or with (lower 3 panels) PTH treatment  
73 from day 7 to 21 after CS implantation. Blue, CFs / Bone (SHG); cyan, OBs  
74 expressing *Col2.3-ECFP*. Scale bar, 25  $\mu$ m.



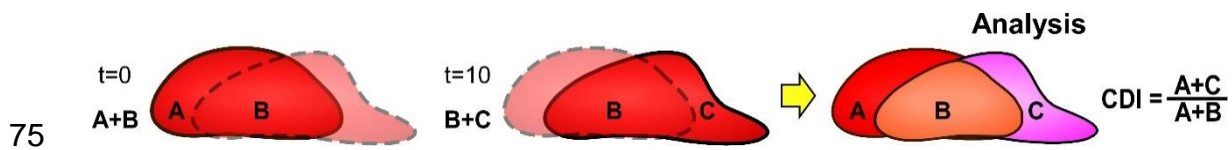

76 **Supplementary figure S5. CDI analysis**

77 Formula of CDI analysis for OCs. Cell shapes were semi-automatically  
 78 recognized by the image analysis software, and three distinct areas were defined  
 79 as follows: the area that was occupied in only the initial time frame (t = 0) (A), the  
 80 area that was occupied in only the final time frame (t = 10) (C), and the  
 81 overlapping area in the initial and final frames (B). The CDI was calculated as (A  
 82 + C) / (A + B) and represents the ratio of the cell areas changed during the 10-  
 83 min interval. Low CDI value correlates with the low motility and high bone  
 84 resorptive activity of OCs. The images were created by Canvas software (version  
 85 X 16, <https://www.canvasgfx.com/>).

86 **Supplementary Movie 1. Intravital two-photon imaging of BMP-induced**  
87 **bone in Col2.3-ECFP mice with visualized blood vessels**

88 Mice were treated with tetramethyl rhodamine via intravenous injection before  
89 imaging. Sequential images in the same visual field were acquired under control  
90 conditions. Cyan: OBs expressing Col2.3-ECFP; red: blood vessels stained with  
91 rhodamine; blue: CFs/bone (SHG). Scale bar, 100  $\mu$ m. Playback speed, 3600 $\times$ .

92

93 **Supplementary Movie 2. Intravital two-photon imaging of BMP-induced**  
94 **ectopic bone formation process in Col2.3-ECFP mice with visualized blood**  
95 **vessels**

96 Mice were treated with tetramethyl rhodamine via intravenous injection before  
97 imaging. Sequential images in the same visual field were acquired under control  
98 conditions. Cyan: OBs expressing Col2.3-ECFP; red: blood vessels stained with  
99 rhodamine; blue: CFs/bone (SHG). Scale bar, 100  $\mu$ m. Playback speed, 1800 $\times$ .

100

101 **Supplementary Movie 3. Intravital two-photon imaging of OBs and OCs**  
102 **during the BMP-induced ectopic bone formation process in Col2.3-**  
103 **ECFP/TRAP-tdTomato mice treated with or without PTH**

104 Mice were treated with PTH (40 µg/kg/day, 5 days/week) via subcutaneous  
105 injections. Sequential images in the same visual field were acquired. Cyan: OBs  
106 expressing Col2.3-ECFP; red: OCs expressing TRAP-tdTomato; blue: CFs/bone  
107 (SHG). Scale bar, 100 µm. Playback speed, 3600×.
